# Supplementary material for: NMR Structure of the FIV gp36 C-terminal Heptad Repeat and Membrane-Proximal External Region
Source: PubMed Central journal article supplement (PMC7139756; doi:10.3390/ijms21062037), 2020-03-16

*Table of Contents:*

**Fig. S1:** A)  $^{15}\text{N}$ -HSQC NMR spectrum of ( $^{15}\text{N}$ - $^{13}\text{C}$ )-labeled gp36-MPER in DPC/SDS 90:10 M/M mixed micelles; B) folded  $^{13}\text{C}$ -HSQC NMR spectrum of ( $^{15}\text{N}$ - $^{13}\text{C}$ )-labeled gp36-MPER in DPC/SDS 90:10 M/M mixed micelles.

**Table S1:** TALOS+ prediction of gp36 CHR-MPER backbone dihedral angles (PHI, PSI), estimated standard deviations of the prediction errors in PHI and PSI (DPHI, DPSI), TALOS+ database matching score (DIST), Wishart RCI chemical shift order parameter (S2), number of database triplets used to form the torsion angle predictions (COUNT, CS COUNT), classification of the prediction result (CLASS; **None** if no torsion prediction was made, **Good** if majority consensus in database matches, **Warn** if no consensus in database matches, **Dyn** if RCI S2 value indicates dynamic conformation).

**Table S2:**  $^1\text{H}$ ,  $^{15}\text{N}$  and  $^{13}\text{C}$  chemical shift of ( $^{15}\text{N}$ - $^{13}\text{C}$ )-labeled gp36-MPER in DPC/SDS 90:10 M/M mixed micelles.

**Fig. S2:** A) FPLC chromatogram ; B) HPLC chromatogram, obtained using gradient: 10-40 B in 20 min poi 40-70 B in 30 min, Buffer A: water + TFA 0.1%, Buffer B: Acetonitril + TFA 0.1%; C) SDS-PAGE of FPLC fractions (4-5), after cleavage (6) and HPLC fractions (7 KSI - 8 isotope labeled gp36-MPER).

**Figure S1:** A)  $^{15}\text{N}$ -HSQC NMR spectrum of ( $^{15}\text{N}$ - $^{13}\text{C}$ )-labeled gp36-MPER in DPC/SDS 90:10 M/M mixed micelles; B) folded  $^{13}\text{C}$ -HSQC NMR spectrum of ( $^{15}\text{N}$ - $^{13}\text{C}$ )-labeled gp36-MPER in DPC/SDS 90:10 M/M mixed micelles.

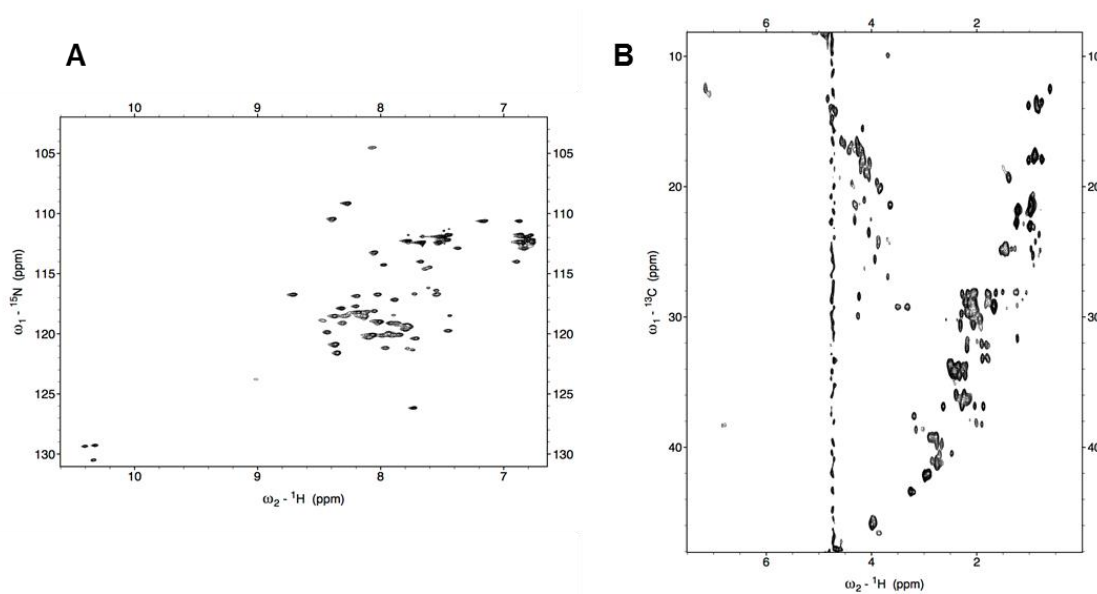

**Table S1:** TALOS+ prediction backbone dihedral angles of 0.5 mg (<sup>15</sup>N-<sup>13</sup>C)-labeled gp36 CHR-MPER acquired on Bruker 900 MHz in DPC/SDS 90:10 M/M mixed micelles, at pH 7.4 and at 300 K. Gp36 CHR-MPER backbone dihedral angles (PHI, PSI), estimated standard deviations of the prediction errors in PHI and PSI (DPHI, DPSI), TALOS+ database matching score (DIST), Wishart RCI chemical shift order parameter (S<sup>2</sup>), number of database triplets used to form the torsion angle predictions (COUNT, CS COUNT), classification of the prediction result (CLASS; **None** if no torsion prediction was made, **Good** if majority consensus in database matches, **Warn** if no consensus in database matches, **Dyn** if RCI S<sup>2</sup> value indicates dynamic conformation).

| RESID | RESNAME | PHI (°) | PSI (°) | DPHI (°) | DPSI (°) | DIST   | S <sup>2</sup> | COUNT | CS_COUNT | CLASS    |
|-------|---------|---------|---------|----------|----------|--------|----------------|-------|----------|----------|
| 740   | T       | -59.27  | -32.743 | 6.798    | 6.694    | 0.295  | 0.82           | 25    | 13       | Strong   |
| 741   | K       | -64.099 | -36.692 | 3.451    | 5.224    | 0.198  | 0.838          | 25    | 15       | Strong   |
| 742   | D       | -69.767 | -38.96  | 3.261    | 4.211    | 0.139  | 0.864          | 25    | 14       | Strong   |
| 743   | L       | -64.344 | -42.725 | 3.785    | 3.874    | 0.119  | 0.872          | 25    | 14       | Strong   |
| 744   | Q       | -61.889 | -42.434 | 2.942    | 3.434    | 0.118  | 0.88           | 25    | 14       | Strong   |
| 745   | Q       | -64.923 | -41.272 | 1.866    | 2.816    | 0.123  | 0.875          | 25    | 14       | Strong   |
| 746   | K       | -65.752 | -40.177 | 3.738    | 4.614    | 0.136  | 0.875          | 25    | 14       | Strong   |
| 747   | F       | -67.009 | -36.821 | 4.576    | 5.526    | 0.181  | 0.88           | 25    | 14       | Strong   |
| 748   | Y       | -64.819 | -33.798 | 3.675    | 6.293    | 0.265  | 0.865          | 25    | 14       | Strong   |
| 749   | E       | -66.576 | -34.207 | 6.072    | 6.355    | 0.479  | 0.837          | 25    | 13       | Strong   |
| 750   | I       | -71.134 | -33.281 | 8.714    | 9.908    | 0.685  | 0.823          | 10    | 12       | Generous |
| 751   | I       | -70.167 | -33.55  | 12.121   | 10.156   | 0.628  | 0.839          | 25    | 12       | Strong   |
| 752   | L       | -64.437 | -41.439 | 3.934    | 4.164    | 0.499  | 0.867          | 25    | 13       | Strong   |
| 753   | D       | -66.624 | -39.424 | 4.273    | 3.586    | 0.333  | 0.88           | 25    | 13       | Strong   |
| 754   | I       | -64.585 | -41.763 | 3.305    | 3.019    | 0.218  | 0.87           | 25    | 14       | Strong   |
| 755   | E       | -64.433 | -37.712 | 3.857    | 7.155    | 0.188  | 0.85           | 25    | 14       | Strong   |
| 756   | Q       | -66.81  | -29.89  | 4.93     | 7.798    | 0.195  | 0.79           | 25    | 15       | Strong   |
| 757   | N       | -72.646 | -23.666 | 8.89     | 9.49     | 0.249  | 0.675          | 25    | 15       | Strong   |
| 758   | N       | -83.381 | -9.776  | 13.122   | 14.316   | 0.301  | 0.578          | 10    | 15       | Dyn      |
| 759   | V       | -85.832 | -17.811 | 11.078   | 12.641   | 0.347  | 0.549          | 7     | 15       | Dyn      |
| 760   | Q       | -59.901 | 127.866 | 5.762    | 5.666    | 0.377  | 0.574          | 25    | 13       | Dyn      |
| 761   | G       | 80.971  | 4.017   | 10.068   | 14.434   | 0.67   | 0.596          | 25    | 13       | Dyn      |
| 762   | K       | -119.08 | 32.449  | 13.865   | 27.416   | 1.519  | 0.584          | 5     | 13       | Dyn      |
| 763   | T       | -81.612 | 138.095 | 27.123   | 13.574   | -1.319 | 0.59           | 25    | 13       | Dyn      |
| 764   | G       | 87.54   | 4.72    | 9.69     | 15.78    | 1.065  | 0.652          | 25    | 12       | Strong   |
| 765   | I       | -83.032 | -23.771 | 21.661   | 19.913   | 0.665  | 0.732          | 6     | 12       | Warn     |
| 766   | Q       | -64.897 | -37.011 | 6.741    | 7.086    | 0.508  | 0.797          | 25    | 14       | Strong   |
| 767   | Q       | -65.743 | -40.861 | 4.731    | 5.737    | 0.497  | 0.798          | 25    | 14       | Strong   |
| 768   | L       | -64.078 | -40.361 | 4.498    | 4.57     | 0.558  | 0.792          | 25    | 13       | Strong   |
| 769   | Q       | -67.642 | -35.127 | 4.154    | 4.969    | 0.479  | 0.761          | 25    | 13       | Strong   |

|     |   |         |         |        |        |       |       |    |    |                 |
|-----|---|---------|---------|--------|--------|-------|-------|----|----|-----------------|
| 770 | K | -67.202 | -36.082 | 5.542  | 5.681  | 0.429 | 0.777 | 25 | 13 | <b>Strong</b>   |
| 771 | W | -70.467 | -33.251 | 11.365 | 13.761 | 0.383 | 0.809 | 25 | 14 | <b>Strong</b>   |
| 772 | E | -63.52  | -41.008 | 5.068  | 6.5    | 0.318 | 0.869 | 25 | 14 | <b>Strong</b>   |
| 773 | D | -67.762 | -37.224 | 4.255  | 5.09   | 0.298 | 0.884 | 25 | 15 | <b>Strong</b>   |
| 774 | W | -64.26  | -43.256 | 3.666  | 6.78   | 0.43  | 0.868 | 25 | 14 | <b>Strong</b>   |
| 775 | V | -65.844 | -35.363 | 7.173  | 7.915  | 0.559 | 0.853 | 25 | 11 | <b>Strong</b>   |
| 776 | G | -65.321 | -35.277 | 4.082  | 7.93   | 0.755 | 0.826 | 8  | 10 | <b>Warn</b>     |
| 777 | W | -65.683 | -36.749 | 5.126  | 8.095  | 0.782 | 0.808 | 25 | 10 | <b>Strong</b>   |
| 778 | I | -79.538 | -15.175 | 13.499 | 16.625 | 0.862 | 0.756 | 25 | 11 | <b>Strong</b>   |
| 779 | G | -72.287 | -19.263 | 11.195 | 6.852  | 0.938 | 0.708 | 4  | 12 | <b>Warn</b>     |
| 780 | N | -95.479 | -8.29   | 13.461 | 12.633 | 0.686 | 0.64  | 10 | 12 | <b>Generous</b> |
| 781 | I | -70.999 | 136.664 | 6.686  | 11.093 | 0.799 | 0.627 | 25 | 9  | <b>Strong</b>   |
| 782 | P | -58.878 | 143.966 | 6.645  | 8.142  | 0.811 | 0.662 | 25 | 8  | <b>Strong</b>   |
| 783 | Q | -59.959 | -34.931 | 3.728  | 5.313  | 0.996 | 0.72  | 25 | 8  | <b>Strong</b>   |
| 784 | Y | -74.76  | -18.594 | 15.94  | 20.997 | 0.948 | 0.727 | 25 | 12 | <b>Strong</b>   |
| 785 | L | -65.858 | -30.25  | 8.291  | 7.025  | 0.817 | 0.715 | 25 | 8  | <b>Strong</b>   |

**Table S2:**  $^1\text{H}$ ,  $^{15}\text{N}$  and  $^{13}\text{C}$  chemical shift of 0.5 mg ( $^{15}\text{N}$ - $^{13}\text{C}$ )-labeled gp36-MPER acquired on Bruker 900 MHz in DPC/SDS 90:10 M/M mixed micelles. The final pH was 7.4. NMR experiments were recorded at 300 K.

| Number Residue | Residue | HN    | $^{15}\text{N}$ | $^{13}\text{C}\alpha$ | H $\alpha$ | $^{13}\text{C}\beta$ | H $\beta$   | H $\gamma$  | Others                                                                |
|----------------|---------|-------|-----------------|-----------------------|------------|----------------------|-------------|-------------|-----------------------------------------------------------------------|
| 738            | Q       |       |                 | 54.736                | 4.752      | 30.450               | 2.615/2.311 |             |                                                                       |
| 739            | T       | 8.752 | 117.073         | 65.468                | 4.290      | 68.366               | 4.155       |             |                                                                       |
| 740            | K       | 8.387 | 120.983         | 58.262                | 4.217      | 32.055               | 1.851       |             |                                                                       |
| 741            | D       | 7.796 | 119.367         | 56.514                | 4.610      | 40.956               | 2.821       |             |                                                                       |
| 742            | L       | 7.741 | 120.066         | 58.351                | 4.020      |                      | 1.677       |             | QQ $\delta$ 0.924                                                     |
| 743            | Q       | 8.337 | 117.844         | 60.124                | 3.833      | 28.693               | 2.258       |             |                                                                       |
| 744            | Q       | 7.932 | 117.201         | 58.798                | 4.134      | 28.051               | 2.249       |             |                                                                       |
| 745            | K       | 7.929 | 118.588         | 58.332                | 4.177      |                      | 1.983       | 1.559       | Q $\delta$ 1.804                                                      |
| 746            | F       | 8.368 | 111.615         | 61.053                | 4.203      | 38.576               | 3.135       |             | Q $\delta$ 7.111                                                      |
| 747            | Y       | 8.128 | 117.472         | 61.007                | 4.122      | 37.938               | 3.189       |             | Q $\epsilon$ 7.115<br>C $\epsilon$ 1 92.892                           |
| 748            | E       | 8.088 | 117.921         | 58.059                | 4.010      |                      | 2.081       | 2.337       |                                                                       |
| 749            | I       | 7.918 | 119.996         | 59.189                | 4.063      |                      | 1.896       | 1.524       | Q $\delta$ 1 0.793                                                    |
| 750            | I       | 7.831 | 118.343         | 60.388                | 3.825      |                      | 1.919       | 1.266/1.011 | Q $\delta$ 1 0.830                                                    |
| 751            | L       | 7.938 | 120.068         | 62.522                | 3.999      |                      | 1.701       |             | QQ $\delta$ 0.807                                                     |
| 752            | D       | 7.733 | 119.459         | 56.789                | 4.514      | 41.197               | 2.711       |             |                                                                       |
| 753            | I       | 8.003 | 120.007         | 64.227                | 3.876      |                      | 1.906       | 1.080/0.894 |                                                                       |
| 754            | E       | 8.389 | 121.040         | 58.836                | 4.068      | 29.435               | 2.124       |             |                                                                       |
| 755            | Q       | 8.221 | 117.395         | 57.850                | 4.133      | 28.789               | 2.152       |             |                                                                       |
| 756            | N       | 8.127 | 116.880         | 54.230                | 4.663      | 39.125               | 2.807       |             |                                                                       |
| 757            | N       | 8.238 | 118.284         | 53.950                | 4.748      | 39.115               | 2.897/2.730 |             |                                                                       |
| 758            | V       | 8.047 | 119.072         | 63.518                | 4.042      | 32.100               | 2.195       | 0.955       |                                                                       |
| 759            | Q       | 8.405 | 121.028         | 56.755                | 4.255      | 28.856               | 2.104/2.017 |             |                                                                       |
| 760            | G       | 8.247 | 108.979         | 45.809                | 4.121      |                      |             |             |                                                                       |
| 761            | K       | 8.136 | 120.069         | 57.020                | 4.188      | 33.020               | 1.830       | 1.335       |                                                                       |
| 762            | T       | 8.101 | 113.101         | 61.134                | 4.338      | 69.847               | 4.650       |             |                                                                       |
| 763            | G       | 8.437 | 110.298         | 45.914                | 3.963      |                      |             |             |                                                                       |
| 764            | I       | 8.165 | 120.090         | 59.331                | 4.026      |                      | 1.909       | 1.420/0.894 |                                                                       |
| 765            | Q       | 8.420 | 121.495         | 58.691                | 4.098      | 28.690               | 2.350/2.062 |             |                                                                       |
| 766            | Q       | 8.154 | 118.402         | 57.098                | 4.239      | 28.641               | 2.058       |             |                                                                       |
| 767            | L       | 7.877 | 119.893         | 62.603                | 4.322      |                      | 1.738       |             | QQ $\delta$ 0.807                                                     |
| 768            | Q       | 7.802 | 119.419         | 55.532                | 4.437      |                      | 1.918/1.813 | 2.191       |                                                                       |
| 769            | K       | 7.619 | 116.117         | 57.040                | 4.182      | 33.064               | 1.841       |             |                                                                       |
| 770            | W       | 8.023 | 114.881         | 57.216                | 4.607      |                      | 3.411       |             | H $\epsilon$ 1 10.512<br>N $\epsilon$ 1 123.999                       |
| 771            | E       | 8.408 | 119.529         | 59.912                | 3.865      | 29.285               | 2.080       |             |                                                                       |
| 772            | D       | 8.148 | 118.450         | 56.963                | 4.354      | 40.357               | 2.677/2.293 |             |                                                                       |
| 773            | W       | 7.932 | 120.979         | 61.338                | 4.352      | 29.151               | 3.537/3.300 |             | H $\delta$ 1 7.263<br>H $\epsilon$ 1 10.424<br>N $\epsilon$ 1 123.126 |
| 774            | V       | 8.282 | 118.522         | 61.411                | 3.626      |                      | 2.131       | 1.052/0.938 |                                                                       |
| 775            | R       | 8.097 | 119.012         |                       | 4.231      |                      |             |             |                                                                       |
| 776            | W       | 7.865 | 120.025         | 61.455                | 4.288      |                      | 3.389       |             | H $\epsilon$ 1 10.511                                                 |
| 777            | I       | 8.493 | 118.531         | 61.471                | 3.648      |                      | 2.050       | 1.484/0.988 |                                                                       |
| 778            | G       | 8.073 | 104.570         | 46.587                | 3.853      |                      |             |             |                                                                       |

|            |          |       |         |        |       |        |             |                        |
|------------|----------|-------|---------|--------|-------|--------|-------------|------------------------|
| <b>779</b> | <b>N</b> | 7.412 | 116.699 | 53.260 | 4.826 | 39.672 | 2.756/2.678 |                        |
| <b>780</b> | <b>I</b> | 7.800 | 121.083 | 60.065 | 3.783 |        | 2.101       | 1.663 Qδ1 0.904        |
| <b>781</b> | <b>P</b> |       |         |        |       |        |             | 2.042 Qδ 3.854         |
| <b>782</b> | <b>Q</b> | 7.946 | 119.632 | 65.547 | 3.985 |        | 2.021       |                        |
| <b>783</b> | <b>Y</b> | 7.939 | 119.882 | 57.352 | 4.260 |        | 3.154       | Qε 7.149<br>Cε1 92.486 |
| <b>784</b> | <b>L</b> | 7.738 | 116.447 | 57.971 | 4.134 |        | 1.862       | QQδ 0.872              |
| <b>785</b> | <b>K</b> |       |         |        |       |        |             |                        |
| <b>786</b> | <b>M</b> |       |         |        |       |        |             |                        |

---

**Figure S2: A)** FPLC chromatogram obtained using: binding buffer (10 mM Guanidine, 0,5 M NaCl, 20 mM Tris-HCl and 15mM Imidazole) and elution buffer (10 mM Guanidine, 0,5 M NaCl, 20 mM Tris-HCl and 50 mM Imidazole). The protein was purified using His-Trap™ HP column at 1 mL/min and AKTA purifier system. **B)** HPLC chromatogram, obtained using gradient: 10-40 B in 20 min then 40-70 B in 30 min, Buffer A: water + TFA 0.1%, Buffer B: Acetonitril + TFA 0.1%; the protein was purified using C18 Phenomenex™ column at 2 mL/min. **C)** SDS-PAGE of FPLC fractions (4-5), after cleavage (6) and HPLC fractions (7 KSI - 8 isotope labeled gp36 CHR-MPER).

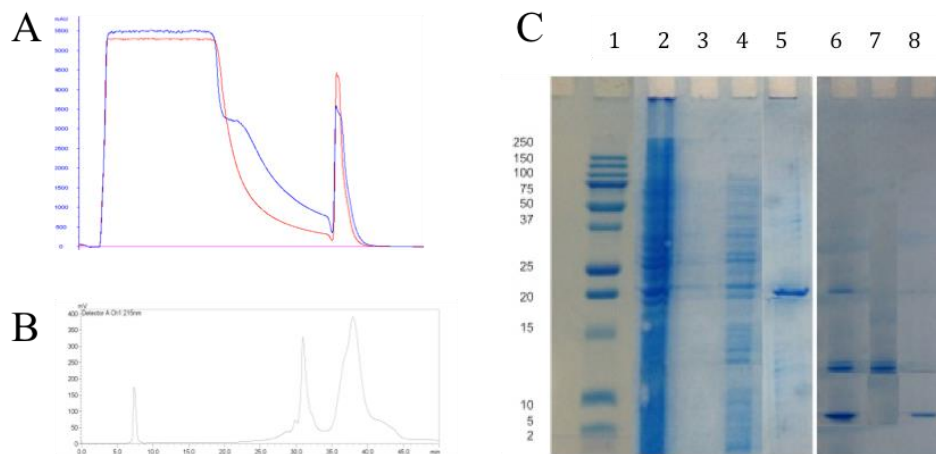

Supplement: ijms-21-02037-s001.pdf [file ijms-21-02037-s001.pdf]
